# Supplementary material for: Senescence‐associated transcriptional derepression in subtelomeres is determined in a chromosome‐end‐specific manner
Source: PubMed Central journal article supplement (PMC10186611; doi:10.1111/acel.13804), 2023-03-15
Supplement: ACEL-22-e13804-s001.pdf [file ACEL-22-e13804-s001.pdf]

|                                | 1p      | 3q      | 8q      | 9q      | 11p     | 16p     | 16q     | 19p      | 20q     | 22q     |
|--------------------------------|---------|---------|---------|---------|---------|---------|---------|----------|---------|---------|
| RS vs young <sup>a</sup>       |         |         | 1.91e-4 | 4.40e-7 | 7.69e-4 | 6.09e-8 | 6.22e-5 | 2.21e-11 |         | 3.71e-5 |
| siLMNB1 vs siCtrl <sup>b</sup> |         |         | 6.73e-5 |         |         |         |         |          |         | 6.07e-3 |
| RS signature <sup>c</sup>      |         |         |         | 2.92e-3 | 2.63e-4 | 7.25e-4 |         |          |         |         |
| OIS signature <sup>c</sup>     |         | 6.11e-4 | 2.20e-3 | 9.60e-3 |         |         | 5.94e-3 |          | 1.85e-4 |         |
| IRIS signature <sup>c</sup>    |         |         |         |         |         |         |         |          |         | 1.34e-3 |
| GTEX dataset <sup>d</sup>      | 8.74e-4 |         | 3.80e-3 | 4.98e-4 | 5.86e-3 | 8.87e-7 |         |          | 4.69e-5 | 3.76e-4 |

**Supplementary table 1. Subtelomere enrichment for upregulated DEGs of different senescence inducers**

Summary of chromosome ends obtained by enrichment analysis of upregulated DEGs upon different senescent stimuli. <sup>a</sup> Replicative senescence (RS) vs young MRC-5 cells and <sup>b</sup> siLMNB1 vs siControl in young cells from this work; RS, <sup>c</sup> oncogene-induced senescence (OIS), ionizing radiation-induced senescence (IRIS) from Hernandez-Segura *et al.* and from <sup>d</sup> aged tissues from the GTEx database from Dong *et al.* The *p*-value of the enrichment was obtained using a hypergeometric test.
