# Supplementary material for: Senescence‐associated transcriptional derepression in subtelomeres is determined in a chromosome‐end‐specific manner
Source: PubMed Central journal article supplement (PMC10186611; doi:10.1111/acel.13804), 2023-03-15
Supplement: ACEL-22-e13804-s003.pdf [file ACEL-22-e13804-s003.pdf]

| Factor_Cell line            | Correlation value | p value              |
|-----------------------------|-------------------|----------------------|
| <b>Positive correlation</b> |                   |                      |
| CTCF_HFFc6                  | 0.516572          | 6.7636032902782e-07  |
| MAZ_IMR90                   | 0.515417          | 7.23256950583623e-07 |
| CTCF_BJ                     | 0.514085          | 7.81140356708368e-07 |
| CTCF_IMR90                  | 0.511593          | 9.01416044558095e-07 |
| CTCF_AG10803                | 0.487943          | 3.32108640069207e-06 |
| CTCF_AG04450                | 0.487943          | 3.32108640069207e-06 |
| CTCF_AG04449                | 0.485453          | 3.78853290070119e-06 |
| CTCF_AG09319                | 0.482964          | 4.3173305066657e-06  |
| CTCF_WI38                   | 0.482365          | 4.45447632047301e-06 |
| CTCF_HFFMyc                 | 0.47799           | 5.58808132588906e-06 |
| H3K27me3_SJCRH30            | 0.474454          | 6.69675457725983e-06 |
| H4K20me1_IMR90              | 0.465626          | 1.04309845399865e-05 |
| USF2_IMR90                  | 0.463771          | 1.14311769264503e-05 |
| H3K36me3_BJ                 | 0.453228          | 1.90451726393911e-05 |
| CTCF_AG09309                | 0.451237          | 2.09326854662105e-05 |
| H3K4me3_BJ                  | 0.45061           | 2.15628162896894e-05 |
| H3K4me3_AG04449             | 0.449365          | 2.28659939853691e-05 |
| H3K4me3_AG09309             | 0.44936           | 2.28712563038703e-05 |
| H3K4me3_HFFMyc              | 0.44069           | 3.42031131813033e-05 |
| SMC3_IMR90                  | 0.440657          | 3.42557377270612e-05 |
| H3K4me3_AG04450             | 0.440652          | 3.42632606911855e-05 |
| EZH2_IMR90                  | 0.439383          | 3.6307674386682e-05  |
| H3K4me3_AG09319             | 0.433176          | 4.80559002628514e-05 |
| MXI1_IMR90                  | 0.430778          | 5.34750663907591e-05 |
| H3K4me3_SJCRH30             | 0.429439          | 5.67416116126498e-05 |
| H3K4me3_AG10803             | 0.424463          | 7.05830384270416e-05 |
| H3K4me3_WI38                | 0.423218          | 7.45042113453182e-05 |
| RAD21_IMR90                 | 0.416994          | 9.73234774374079e-05 |
| H3K79me2_IMR90              | 0.413336          | 0.000113596087707541 |
| H3K4me3_GM23248             | 0.4033            | 0.000172063639269657 |
| H3K9ac_IMR90                | 0.402099          | 0.000180670571791162 |
| <b>Negative correlation</b> |                   |                      |
| H3K9me2_GM23248             | -0.272429         | 0.0132823945358119   |
| MAFK_IMR90                  | -0.268871         | 0.0145855503472771   |
| H3K9me3_IMR90               | -0.261398         | 0.0176862409571468   |
| H3K9me3_GM23248             | -0.220121         | 0.0469082004645685   |

**Supplementary table 2.** Correlation coefficient between nine enriched subtelomeres with upregulated DEGs vs the rest of subtelomeres.
